# Supplementary material for: Potential Role of Exosomes in Cancer Metastasis
Source: Hindawi journal article supplement (doi:10.1155/2019/4649705), 2019-07-02
Supplement: f1 [file 4649705.f1.pdf]

## Supplementary Materials

Table S1: Difference among the three main types of EVs

|                 | Exosomes                                                               | Microvesicles                    | Apoptotic bodies                                           |
|-----------------|------------------------------------------------------------------------|----------------------------------|------------------------------------------------------------|
| Size            | 30-100nm (10, 11, 15)                                                  |                                  |                                                            |
|                 | 50-150 (16)                                                            | 50-500nm or up to 1µm (16)       |                                                            |
|                 | 40-100nm (13)                                                          | up to 1000nm or relatively small |                                                            |
|                 | 40-120nm (14)                                                          | vesicle with 100nm (13)          | 500-2000nm (14)                                            |
|                 | 40-200nm, blood exosomes (12)                                          | 50-1000nm (14)                   |                                                            |
|                 | 30-200 (53)                                                            | 150-1000nm (11)                  |                                                            |
|                 |                                                                        | 100-1000nm (10)                  |                                                            |
| Origin          | Endosomal system                                                       | Plasma membrane                  | Plasma membrane                                            |
| Budding process | Inward                                                                 | Outward                          | Outward                                                    |
| Other names     |                                                                        | Platelet dust (16)               |                                                            |
|                 | Prostasomes (13)                                                       | Microparticles (9, 11, 13)       |                                                            |
|                 | Tolerosomes/Dexosomes                                                  | Ectosomes (9, 11, 13)            |                                                            |
|                 | /Nanovesicles/Exosome-like vesicles (16)                               | Oncosomes (16)                   |                                                            |
|                 |                                                                        | Shedding vesicles (11, 13)       |                                                            |
| Release process | Released after multivesicular endosome fusion with the plasma membrane | Shedding from plasma membrane    | Released by plasma membrane blebbing during cell apoptosis |
